# Supplementary material for: Newly Established Monoclonal Antibody Diagnostic Assays for Schistosoma mansoni Direct Detection in Areas of Low Endemicity
Source: PubMed Central journal article supplement (PMC3909226; doi:10.1371/journal.pone.0087777), 2014-01-31

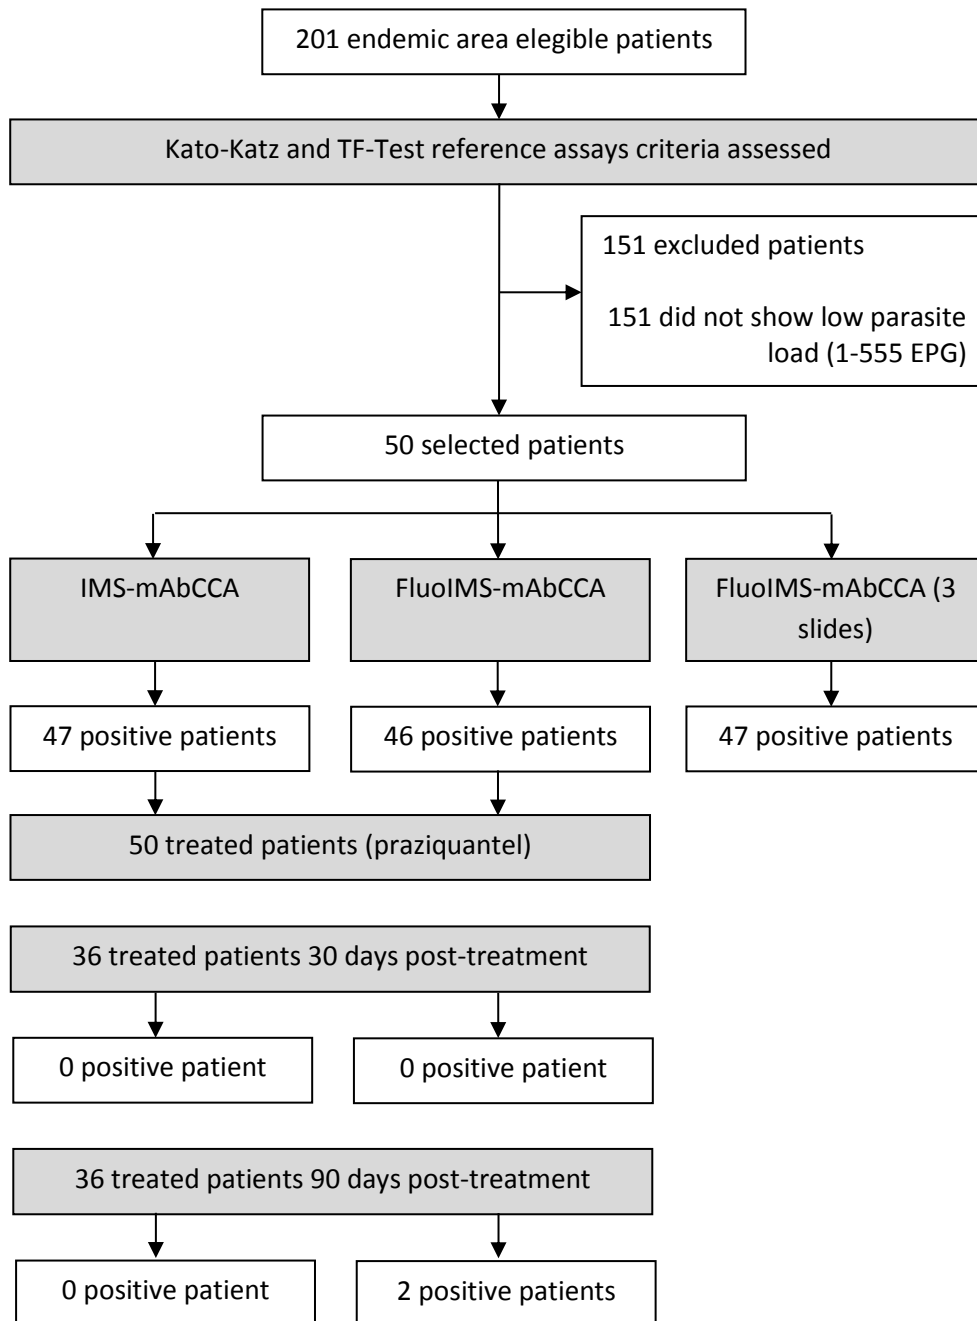

Supplement: pone.0087777.s001.pdf [file pone.0087777.s001.pdf]
